# Supplementary material for: Evaluation and Development of a Nutrition Model to Predict Intake and Growth of Suckling Calves
Source: MDPI journal article supplement (doi:10.3390/ruminants4010004), 2024-01-28
Supplement: s1 [file s1]

### Supplementary Tables

**Table S1.** Sum of the absolute difference between observed and predicted milk yield between milk yield equations at different peak milk yield groups in the dairy calf dataset.

| Peak Milk Group <sup>1</sup> | NASEM <sup>2</sup> | WOOD   | SEM  | P-value |
|------------------------------|--------------------|--------|------|---------|
| 2.72 kg/d                    | 3.695              | 0.518  | 1.02 | 0.14    |
| 5.44 kg/d                    | 6.982              | 1.552  | 1.02 | 0.01    |
| 8.16 kg/d                    | 9.962              | 2.871  | 1.02 | 0.01    |
| 10.88 kg/d                   | 10.631             | 8.395  | 1.09 | 0.56    |
| 13.6 kg/d                    | 9.603              | 15.442 | 1.02 | 0.01    |

<sup>1</sup> Peak milk groups are treatment groups used by Abdelsamie [28].

<sup>2</sup> NASEM = milk yield equation from National Academy of Science Engineering and Medicine [2]; WOOD = milk yield equation from Wood [26].

**Table S2.** Descriptive statistics of the dairy cattle serial slaughter dataset used to evaluate the empty body weight gain equation of the National Academies of Science, Engineering and Medicine [2] and develop a new equation.

| Item                          | N  | Mean  | SD    | Minimum | Maximum |
|-------------------------------|----|-------|-------|---------|---------|
| Initial empty body weight, kg | 62 | 82.6  | 86.9  | 24.9    | 345.0   |
| Final empty body weight, kg   | 62 | 124.8 | 108.9 | 29.3    | 432.0   |
| Empty body weight, kg         | 62 | 103.7 | 97.6  | 27.1    | 388.5   |
| Empty body gain, kg/d         | 62 | 0.65  | 0.25  | 0.16    | 1.21    |
| Empty body protein gain, kg/d | 62 | 0.116 | 0.047 | 0.031   | 0.264   |
| Empty body fat gain, kg/d     | 62 | 0.137 | 0.134 | 0.013   | 0.680   |
| Retained energy, Mcal/d       | 62 | 1.933 | 1.311 | 0.437   | 6.829   |

**Table S3.** Evaluation of the empty body weight gain equation of the National Academies of Science, Engineering and Medicine [2] in the dairy cattle serial slaughter dataset.

| Item <sup>1</sup>  | Prewaning <sup>2</sup> | Postweaning         | Overall             |
|--------------------|------------------------|---------------------|---------------------|
| CCC                | 0.314                  | 0.934               | 0.329               |
| Cb                 | 0.427                  | 0.983               | 0.514               |
| MB (SD), kg/d      | 0.470 (0.268)          | 0.042 (0.090)       | 0.401 (0.294)       |
| MB, %              | 75.62                  | 5.14                | 61.47               |
| Intercept $\pm$ SE | 0.1317 $\pm$ 0.0677    | 0.0716 $\pm$ 0.0902 | 0.2128 $\pm$ 0.0724 |
| Slope $\pm$ SE     | 0.4488 $\pm$ 0.0585    | 0.8673 $\pm$ 0.1006 | 0.4173 $\pm$ 0.0646 |
| Pr > F             | <0.0001                | 0.1941              | <0.0001             |

<sup>1</sup> CCC = concordance correlation coefficient; Cb = bias correction factor; MB = mean bias; Intercept = intercept coefficient of linear regression of observed on predicted values; Slope = slope coefficient of linear regression of observed on predicted values; Pr > F = p-value for linear hypothesis test.

<sup>2</sup> Prewaning = < 200 kg final empty body weight; Postweaning = > 200kg initial empty body weight.

**Table S4.** Significance of model coefficients and fit statistics for equations developed to predict empty body weight gain in the dairy cattle serial slaughter dataset.

| Model <sup>1</sup> | P-value (a) | P-value (b) | P-value (c) | AIC <sup>2</sup> |
|--------------------|-------------|-------------|-------------|------------------|
| Eq1                | <0.0001     | <0.0001     | -           | -59.39           |
| Eq2                | 0.0003      | <0.0001     | -           | -23.34           |
| Eq3                | <0.0001     | <0.0001     | <0.0001     | -88.92           |
| Eq4                | <0.0001     | <0.0001     | -           | -109.10          |
| Eq5                | <0.0001     | <0.0001     | -           | -90.14           |
| Eq6                | 0.0009      | <0.0001     | 0.0291      | -109.16          |

<sup>1</sup> Eq1 =  $a \times RE^b$  fixed effect model; Eq2 =  $a \times (RE/EBW^{75})^b$  fixed effect model; Eq3 =  $a \times RE^b \times EBW^c$  fixed effect model; Eq4 =  $a \times RE^b$  mixed effect model; Eq5 =  $a \times (RE/EBW^{75})^b$  mixed effect model; Eq6 =  $a \times RE^b \times EBW^c$  mixed effect model

<sup>2</sup> AIC = Akaike Information Criteria

**Table S5.** Cross validation of the final mixed effect equation ( $EBG = a \times RE^b \times EBW^c$ ) to predict empty body weight gain in the dairy cattle serial slaughter dataset<sup>1</sup>.

| Item <sup>2</sup>              | Value                |
|--------------------------------|----------------------|
| RMSE (SD), kg/d                | 0.060 (0.027)        |
| R <sup>2</sup> (SD)            | 0.825 (0.149)        |
| Mean absolute error (SD), kg/d | 0.050 (0.025)        |
| Intercept $\pm$ SE             | -0.0071 $\pm$ 0.0229 |
| Slope $\pm$ SE                 | 1.0093 $\pm$ 0.0321  |

<sup>1</sup> EBG = empty body weight gain, kg/d; RE = retained energy, Mcal/d; EBW = empty body weight, kg;  $a = 0.78621 \pm 0.24082$ ,  $p = 0.0009$ ;  $b = 0.78512 \pm 0.06029$ ,  $p = <0.0001$ ;  $c = -0.14361 \pm 0.07423$ ,  $p = 0.0291$ .

<sup>2</sup> RMSE = root mean square error; SD = standard deviation; R<sup>2</sup> = coefficient of determination; Intercept = intercept coefficient of linear regression of observed on predicted empty body gain; SE = standard error; Slope = slope coefficient of linear regression of observed on predicted empty body gain

**Table S6.** Descriptive statistics of the forage in vitro/in vivo digestibility dataset used to develop and evaluate forage digestibility equation.

| Item <sup>1</sup>    | N   | Mean  | SD    | Minimum | Maximum |
|----------------------|-----|-------|-------|---------|---------|
| Crude protein, %     | 112 | 10.27 | 4.59  | 3.60    | 23.20   |
| NDF <sup>1</sup> , % | 82  | 67.50 | 9.77  | 42.80   | 86.41   |
| ADF, %               | 79  | 41.12 | 6.44  | 30.30   | 54.60   |
| IVDMD, %             | 149 | 57.69 | 9.23  | 30.60   | 81.60   |
| IVOMD, %             | 56  | 54.22 | 10.09 | 33.20   | 82.90   |
| DMD, %               | 142 | 56.66 | 7.85  | 27.30   | 76.00   |
| OMD, %               | 52  | 56.17 | 10.93 | 29.20   | 83.00   |

<sup>1</sup> NDF = neutral detergent fiber; ADF = acid detergent fiber; IVDMD = in vitro dry matter digestibility; IVOMD = in vitro organic matter digestibility; DMD = in vivo dry matter digestibility; OMD = in vivo organic matter digestibility

**Table S7.** Evaluation of in vitro versus in vivo digestibility in the forage digestibility dataset.

| Item <sup>1</sup> | DMD              | OMD             |
|-------------------|------------------|-----------------|
| N                 | 127              | 40              |
| CCC               | 0.495            | 0.887           |
| Cb                | 0.966            | 0.976           |
| MB (SD), % units  | -1.582 (7.757)   | 2.263 (4.590)   |
| MB, %             | -2.75            | 3.97            |
| Intercept ± SE    | 31.7540 ± 3.8753 | 9.4319 ± 3.6123 |
| Slope ± SE        | 0.4339 ± 0.0652  | 0.8691 ± 0.0647 |
| Pr > F            | < 0.0001         | 0.0021          |

<sup>1</sup> DMD = In vitro vs. in vivo dry matter digestibility; OMD = in vitro vs. in vivo organic matter digestibility; N = number of observations; CCC = concordance correlation coefficient; Cb = bias correction factor; MB = mean bias; SD = standard deviation; Intercept = intercept coefficient of linear regression of observed on predicted values; SE = standard error; Slope = slope coefficient of linear regression of observed on predicted values; Pr > F = p-value for linear hypothesis test.

**Table S8.** Evaluation of dry versus organic matter digestibility in the forage digestibility dataset.

| Item <sup>1</sup> | In vitro        | In vivo         |
|-------------------|-----------------|-----------------|
| N                 | 33              | 27              |
| CCC               | 0.901           | 0.948           |
| Cb                | 0.960           | 0.959           |
| MB (SD), % units  | 2.607 (3.194)   | 2.525 (1.371)   |
| MB, %             | 4.78            | 4.65            |
| Intercept ± SE    | 6.2582 ± 3.2216 | 3.3906 ± 1.6176 |
| Slope ± SE        | 0.9297 ± 0.0611 | 0.9833 ± 0.0308 |
| Pr > F            | 0.0002          | < 0.0001        |

<sup>1</sup> In vitro = in vitro dry matter digestibility vs. in vitro organic matter digestibility; In vivo = In vivo dry matter digestibility vs. in vivo organic matter digestibility; N = number of observations; CCC = concordance correlation coefficient; Cb = bias correction factor; MB = mean bias; SD = standard deviation; Intercept = intercept coefficient of linear regression of observed on predicted values; SE = standard error; Slope = slope coefficient of linear regression of observed on predicted values; Pr > F = p-value for linear hypothesis test.

**Table S9.** Published equations evaluated to predict in vivo dry matter digestibility from in vitro dry matter digestibility in the forage digestibility dataset.

| Equation No. | Study                  | Equation <sup>1</sup>              |
|--------------|------------------------|------------------------------------|
| 1            | Tilley and Terry [30]  | $DMD = 0.99 \times IVDMD - 1.01$   |
| 2            | McLeod and Minson [36] | $DMD = 1.0 \times IVDMD + 0.5$     |
| 3            | McLeod and Minson [36] | $DMD = 0.83 \times IVDMD + 11.8$   |
| 4            | McLeod and Minson [36] | $DMD = 0.73 \times IVDMD + 18.3$   |
| 5            | Terry et al. [37]      | $DMD = 1.02 \times IVDMD - 0.41$   |
| 6            | Terry et al. [37]      | $DMD = 0.89 \times IVDMD + 8.79$   |
| 7            | Goldman et al. [38]    | $DMD = 0.933 \times IVDMD + 1.48$  |
| 8            | Genizi et al. [39]     | $DMD = 0.896 \times IVDMD + 4.4$   |
| 9            | Genizi et al. [39]     | $DMD = 0.856 \times IVDMD + 5.9$   |
| 10           | Genizi et al. [39]     | $DMD = 0.889 \times IVDMD + 4.2$   |
| 11           | Genizi et al. [39]     | $DMD = 0.771 \times IVDMD + 17.3$  |
| 12           | Carro et al. [40]      | $DMD = 0.788 \times IVDMD + 15.8$  |
| 13           | Khazaal et al. [41]    | $DMD = 0.3 \times IVDMD + 41.5$    |
| 14           | Geisert [42]           | $DMD = 1.1626 \times IVDMD - 15.5$ |

<sup>1</sup> DMD = in vivo dry matter digestibility, %; IVDMD = in vitro dry matter digestibility, %

**Table S10.** Evaluation of published equations to predict in vivo DMD from in vitro DMD in the forage digestibility dataset.

| Equation <sup>1</sup> | CCC <sup>2</sup> | Cb    | MB (SD), % units | MB, % | Intercept ± SE     | Slope ± SE      | Pr > F   |
|-----------------------|------------------|-------|------------------|-------|--------------------|-----------------|----------|
| 1                     | 0.515            | 0.987 | 0.039 (7.650)    | 0.07  | 31.7326 ± 3.7412   | 0.4458 ± 0.0647 | < 0.0001 |
| 2                     | 0.497            | 0.953 | -2.058 (7.701)   | -3.61 | 31.0617 ± 3.8376   | 0.4413 ± 0.0641 | < 0.0001 |
| 3                     | 0.468            | 0.897 | -3.365 (6.917)   | -5.89 | 25.0083 ± 4.7097   | 0.5317 ± 0.0772 | < 0.0001 |
| 4                     | 0.437            | 0.838 | -3.987 (6.560)   | -6.99 | 20.2194 ± 5.4013   | 0.6045 ± 0.0878 | < 0.0001 |
| 5                     | 0.491            | 0.942 | -2.325 (7.805)   | -4.07 | 31.4598 ± 3.7804   | 0.4327 ± 0.0628 | < 0.0001 |
| 6                     | 0.456            | 0.875 | -3.882 (7.171)   | -6.80 | 26.9238 ± 4.4335   | 0.4958 ± 0.0720 | < 0.0001 |
| 7                     | 0.515            | 0.988 | 0.900 (7.369)    | 1.58  | 30.5823 ± 3.9066   | 0.4730 ± 0.0687 | < 0.0001 |
| 8                     | 0.520            | 0.998 | 0.155 (7.198)    | 0.27  | 29.1152 ± 4.1177   | 0.4925 ± 0.0715 | < 0.0001 |
| 9                     | 0.516            | 0.990 | 1.006 (7.024)    | 1.76  | 28.2406 ± 4.2437   | 0.5155 ± 0.0749 | < 0.0001 |
| 10                    | 0.518            | 0.993 | 0.767 (7.167)    | 1.34  | 29.1974 ± 4.1059   | 0.4964 ± 0.0721 | < 0.0001 |
| 11                    | 0.395            | 0.757 | -5.397 (6.696)   | -9.45 | 21.3801 ± 5.2336   | 0.5724 ± 0.0831 | < 0.0001 |
| 12                    | 0.415            | 0.795 | -4.896 (6.757)   | -8.58 | 22.4338 ± 5.0814   | 0.5600 ± 0.0813 | < 0.0001 |
| 13                    | 0.309            | 0.592 | -1.911 (6.207)   | -3.35 | -29.7655 ± 12.6457 | 1.4710 ± 0.2137 | 0.0003   |
| 14                    | 0.438            | 0.841 | 4.384 (8.609)    | 7.68  | 37.1660 ± 2.9624   | 0.3796 ± 0.0551 | < 0.0001 |

<sup>1</sup> Equation number refers to the Equation No. in Table S9.

<sup>2</sup> CCC = concordance correlation coefficient; Cb = bias correction factor; MB = mean bias; SD = standard deviation; Intercept = intercept coefficient of linear regression of observed on predicted values; SE = standard error; Slope = slope coefficient of linear regression of observed on predicted values; Pr > F = p-value for linear hypothesis test.

**Table S11.** Cross validation of the final equation ( $OMD = a + b \times IVDMD$ ) to predict in vivo organic matter digestibility in the forage digestibility dataset<sup>1</sup>.

| Item <sup>2</sup>            | Value                |
|------------------------------|----------------------|
| RMSE, % units                | 3.087                |
| R <sup>2</sup>               | 0.8706               |
| Mean absolute error, % units | 2.547                |
| Intercept $\pm$ SE           | 0.0000 $\pm$ 5.0460  |
| Slope $\pm$ SE               | 1.0000 $\pm$ 0.08636 |

<sup>1</sup> OMD = in vivo organic matter digestibility, %; IVDMD = in vitro dry matter digestibility, %  $a = 7.7718 \pm 4.3825$ ,  $p = 0.0979$ ;  $b = 0.8937 \pm 0.0772$ ,  $p = <0.0001$ .

<sup>2</sup> RMSE = root mean square error; R<sup>2</sup> = coefficient of determination; Intercept = intercept coefficient of linear regression of observed on predicted empty body gain; SE = standard error; Slope = slope coefficient of linear regression of observed on predicted empty body gain

**Table S12.** Descriptive statistics of the milk composition dataset used to develop milk energy equation.

| Item            | N   | Mean  | SD   | Minimum | Maximum |
|-----------------|-----|-------|------|---------|---------|
| Yield, kg/d     | 125 | 7.37  | 2.06 | 2.52    | 12.70   |
| Days in milk, d | 125 | 100.4 | 49.9 | 7       | 225     |
| Fat, %          | 125 | 4.65  | 1.43 | 1.15    | 6.83    |
| Protein, %      | 125 | 3.32  | 0.33 | 2.70    | 4.17    |
| Lactose, %      | 125 | 4.90  | 0.25 | 4.17    | 5.26    |
| Energy, Mcal/kg | 125 | 0.82  | 0.14 | 0.49    | 1.03    |

**Table S13.** Regression coefficients ( $\pm$ SE), least square means, and fit statistics for mixed model equations developed to predict milk composition in beef cows.

| Item <sup>1</sup>             | Fat (%)               | Protein (%)         | Lactose (%)         | Energy (Mcal/kg)        |
|-------------------------------|-----------------------|---------------------|---------------------|-------------------------|
| Intercept                     | 3.832 $\pm$ 0.375*    | 3.867 $\pm$ 0.183*  | 4.485 $\pm$ 0.0102* | 0.7285 $\pm$ 0.0372*    |
| Yield                         | -                     | -0.089 $\pm$ 0.019* | 0.039 $\pm$ 0.010*  | -                       |
| DIM                           | 0.0056 $\pm$ 0.0011*  | 0.001 $\pm$ 0.0005* | -                   | 0.00070 $\pm$ 0.00016*  |
| Yield $\times$ DIM            | -0.0011 $\pm$ 0.0002* | -                   | -                   | -0.00012 $\pm$ 0.00003* |
| Breed means                   |                       |                     |                     |                         |
| Taurus                        | 3.57 <sup>a</sup>     | 3.29                | 4.79                | 0.709 <sup>a</sup>      |
| Taurus cross                  | 3.48 <sup>ab</sup>    | 3.34                | 4.79                | 0.702 <sup>ab</sup>     |
| Zebu                          | 4.12 <sup>b</sup>     | 3.23                | 4.95                | 0.766 <sup>b</sup>      |
| Zebu cross                    | 3.69 <sup>ab</sup>    | 3.36                | 4.80                | 0.727 <sup>ab</sup>     |
| Method means                  |                       |                     |                     |                         |
| Machine                       | 3.73                  | 3.33                | 4.82                | 0.730                   |
| Weigh-suckle-weigh            | 3.70                  | 3.28                | 4.85                | 0.722                   |
| RMSE                          | 0.348                 | 0.197               | 0.117               | 0.039                   |
| AIC                           | 211.9                 | 40.7                | -86.3               | -308.8                  |
| Adjusted fixed R <sup>2</sup> | 0.528                 | 0.446               | 0.269               | 0.497                   |

<sup>1</sup> Yield = daily milk yield, kg/d; DIM = days in milk, d; Breed = beef cow breed type categories; Method = method of measuring milk yield; RMSE = root mean square error; AIC = Akaike Information Criteria; Adjusted R<sup>2</sup> = coefficient of determination adjusted to remove variation associated with random effects

\* Regression coefficient is significantly different from zero at  $P \leq 0.05$ .

<sup>ab</sup> LSMeans without a common superscript in the same column and predictor variable differ at  $P \leq 0.05$ .



**Table S14.** Cross validation of the final mixed effect models to predict milk composition in beef cows.

| <b>Item<sup>1</sup></b>  | <b>Fat (%)</b>     | <b>Protein (%)</b> | <b>Lactose (%)</b> | <b>Energy (Mcal/kg)</b> |
|--------------------------|--------------------|--------------------|--------------------|-------------------------|
| RMSE (SD)                | 0.266 (0.172)      | 0.167 (0.122)      | 0.103 (0.100)      | 0.034 (0.022)           |
| R <sup>2</sup> (SD)      | 0.538 (0.361)      | 0.504 (0.351)      | 0.317 (0.295)      | 0.497 (0.348)           |
| Mean absolute error (SD) | 0.220 (0.139)      | 0.140 (0.115)      | 0.093 (0.100)      | 0.029 (0.019)           |
| Intercept $\pm$ SE       | -0.033 $\pm$ 0.111 | -0.164 $\pm$ 0.231 | -0.144 $\pm$ 0.242 | -0.008 $\pm$ 0.022      |
| Slope $\pm$ SE           | 1.007 $\pm$ 0.023  | 1.049 $\pm$ 0.069  | 1.029 $\pm$ 0.049  | 1.009 $\pm$ 0.027       |

<sup>1</sup> RMSE = root mean square error; SD = standard deviation; R<sup>2</sup> = coefficient of determination; Intercept = intercept coefficient of linear regression of observed on predicted empty body gain; SE = standard error; Slope = slope coefficient of linear regression of observed on predicted empty body gain

**Table S15.** Descriptive statistics of the beef cattle serial slaughter dataset used to evaluate the empty body weight gain equation of the National Academies of Science, Engineering and Medicine [2] and develop a new equation.

| <b>Item</b>                   | <b>N</b> | <b>Mean</b> | <b>SD</b> | <b>Minimum</b> | <b>Maximum</b> |
|-------------------------------|----------|-------------|-----------|----------------|----------------|
| Initial empty body weight, kg | 170      | 266.3       | 64.7      | 31.2           | 491.8          |
| Final empty body weight, kg   | 170      | 419.6       | 94.2      | 143.0          | 617.7          |
| Empty body weight, kg         | 170      | 342.9       | 71.8      | 94.4           | 523.9          |
| Empty body gain, kg/d         | 170      | 1.03        | 0.43      | 0.09           | 2.21           |
| Empty body protein gain, kg/d | 170      | 0.145       | 0.079     | -0.013         | 0.513          |
| Empty body fat gain, kg/d     | 170      | 0.397       | 0.194     | 0.024          | 0.913          |
| Retained energy, Mcal/d       | 170      | 4.54        | 2.10      | 0.54           | 9.98           |

**Table S16.** Evaluation of the empty body weight gain equation of the National Academies of Science, Engineering and Medicine [2] in the beef cattle serial slaughter dataset.

| Item <sup>1</sup> | Prewaning        | Postweaning     | Overall         |
|-------------------|------------------|-----------------|-----------------|
| CCC               | 0.843            | 0.770           | 0.777           |
| Cb                | 0.876            | 0.913           | 0.920           |
| MB (SD), kg/d     | 0.142 (0.124)    | -0.152 (0.227)  | -0.139 (0.231)  |
| MB, %             | 24.33            | -14.46          | -13.56          |
| Intercept ± SE    | -0.3218 ± 0.1213 | 0.1349 ± 0.0490 | 0.1036 ± 0.0487 |
| Slope ± SE        | 1.2477 ± 0.1568  | 1.0186 ± 0.0510 | 1.0404 ± 0.0509 |
| Pr > F            | 0.0360           | < 0.0001        | < 0.0001        |

<sup>1</sup> Prewaning = observations with < 200 kg final empty body weight; Postweaning = observations with > 200 kg initial empty body weight; CCC = concordance correlation coefficient; Cb = bias correction factor; MB = mean bias; SD = standard deviation; Intercept = intercept coefficient of linear regression of observed on predicted values; SE = standard error; Slope = slope coefficient of linear regression of observed on predicted values; Pr > F = p-value for linear hypothesis test.

**Table S17.** Fit statistics for equations developed to predict empty body weight gain (kg/d) in beef cattle serial slaughter dataset.

| Equation <sup>1</sup> | P-value (a) <sup>2</sup> | P-value (b) | P-value (c) | AIC     |
|-----------------------|--------------------------|-------------|-------------|---------|
| 1                     | < 0.0001                 | < 0.0001    | -           | -92.81  |
| 2                     | < 0.0001                 | < 0.0001    | -           | -12.18  |
| 3                     | 0.0343                   | < 0.0001    | 0.0351      | -95.00  |
| 4                     | < 0.0001                 | < 0.0001    | -           | -139.36 |
| 5                     | < 0.0001                 | < 0.0001    | -           | -95.51  |
| 6                     | 0.0076                   | < 0.0001    | < 0.0001    | -66.25  |

<sup>1</sup> Eq1 =  $a \times RE^b$  fixed effect model; Eq2 =  $a \times (RE/EBW^{.75})^b$  fixed effect model; Eq3 =  $a \times RE^b \times EBW^c$  fixed effect model; Eq4 =  $a \times RE^b$  mixed effect model; Eq5 =  $a \times (RE/EBW^{.75})^b$  mixed effect model; Eq6 =  $a \times RE^b \times EBW^c$  mixed effect model; RE = retained energy, Mcal/d; EBW = empty body weight, kg.

<sup>2</sup> a = intercept coefficient; b = exponent for RE; c = exponent for EBW.

**Table S18.** Cross validation of the final mixed effect equation ( $EBG = a \times (RE/EBW^{.75})^b$ ) to predict empty body weight gain in the beef cattle serial slaughter dataset<sup>1</sup>.

| Item <sup>2</sup>              | Value                |
|--------------------------------|----------------------|
| RMSE (SD), kg/d                | 0.115 (0.071)        |
| R <sup>2</sup> (SD)            | 0.777 (0.269)        |
| Mean absolute error (SD), kg/d | 0.099 (0.066)        |
| Intercept $\pm$ SE             | -0.0035 $\pm$ 0.0311 |
| Slope $\pm$ SE                 | 1.0031 $\pm$ 0.0294  |

<sup>1</sup> EBG = empty body weight gain, kg/d; RE = retained energy, Mcal/d; EBW = empty body weight, kg;  $a = 7.92787 \pm 0.82538$ ,  $p = < 0.0001$ ;  $b = 0.70834 \pm 0.03853$ ,  $p = < 0.0001$ .

<sup>2</sup> RMSE = root mean square error; SD = standard deviation; R<sup>2</sup> = coefficient of determination; Intercept = intercept coefficient of linear regression of observed on predicted empty body gain; SE = standard error; Slope = slope coefficient of linear regression of observed on predicted empty body gain.
